# Supplementary material for: Radiomics Analysis for 177Lu-DOTAGA-(l-y)fk(Sub-KuE) Targeted Radioligand Therapy Dosimetry in Metastatic Prostate Cancer—A Model Based on Clinical Example
Source: MDPI journal article supplement (doi:10.3390/life11020170), 2021-02-22
Supplement: s1 [file s1]

Case Report

# Radiomics Analysis for $^{177}\text{Lu}$ -DOTAGA-(l-y)fk(Sub-KuE) Targeted Radioligand Therapy Dosimetry in Metastatic Prostate Cancer—A Model Based on Clinical Example

Eve Kelk <sup>1,\*</sup>, Priit Ruuge <sup>2</sup>, Kristi Rohtla <sup>1</sup>, Anne Poksi <sup>1</sup> and Kalevi Kairemo <sup>3</sup>

<sup>1</sup> Center of Nuclear Medicine, East Tallinn Central Hospital, Tallinn 10138, Estonia; kristi.rohtla@itk.ee (K.R.); anne.poksi@itk.ee (A.P.)

<sup>2</sup> Department of Biomedical Engineering, East Tallinn Central Hospital, Tallinn 10138, Estonia; priit.ruuge@itk.ee

<sup>3</sup> Department of Nuclear Medicine, University of Texas MD Anderson Cancer Center, Houston 77030, TX, USA; kalevi.kairemo@gmail.com

\* Correspondence: [eve.kelk@itk.ee](mailto:eve.kelk@itk.ee)

## Supplementary Materials

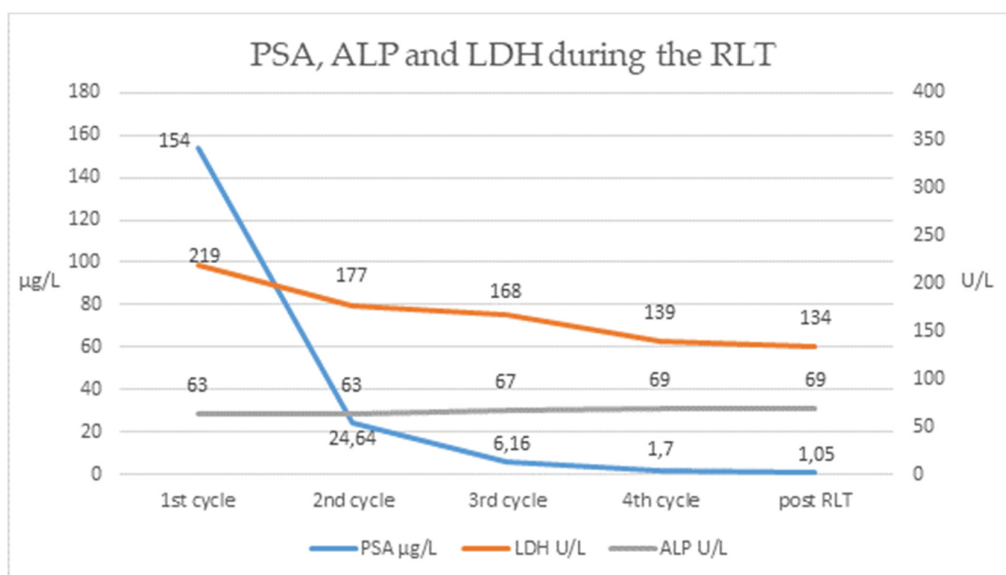

**Figure S1.** Dynamics of biochemical markers – PSA, ALP and LDH – during the RLT.

**Table S1.** Size of normal and Critical Organs.

|              | Size of Normal Organs                      |                  |
|--------------|--------------------------------------------|------------------|
|              | Voxel-based analysis with DRT Mean±SD (ml) | MIRD Mean±SD (g) |
| Left Kidney  | 134.9 ± 3.2                                | 140.4 ± 3.3      |
| Right Kidney | 130.6 ± 4.2                                | 136.1 ± 4.4      |
| Liver        | 1478.9 ± 95.3                              | 1585.9 ± 103.3   |
| Spleen       | 80.6 ± 7.3                                 | 85.1 ± 7.6       |

Volume of parotid and submandibular glands was measured from CT, it was 23 ml and 5.7 ml respectively. The volume of normal lacrimal glands in Caucasian men – 0.68 ml – found from the literature [1].

**Table S2.** SPECT SUVmax and its decrease (%) in different types of metastases during RLT.

| Lesion | Cycle of RLT                       | SUVmax at 4h | SUVmax at 24h | SUVmax at 48h |
|--------|------------------------------------|--------------|---------------|---------------|
| LLN    | 1st                                | 2.69         | 2.64          | 2.06          |
|        | 2nd                                | 1.14         | 0.73          | 0.68          |
|        | Decrease from 1st to 2nd cycle (%) | 57.6         | 72.4          | 67.0          |
|        | 3rd                                | disappeared  | disappeared   | disappeared   |
|        | Decrease from 1st to 3rd cycle (%) | 100          | 100           | 100           |
| DLN1   | 1st                                | 33.56        | 14.36         | 9.8           |
|        | 2nd                                | 5.73         | 2.28          | 1.43          |
|        | Decrease from 1st to 2nd cycle (%) | 82.9         | 84.1          | 85.4          |
|        | 3rd                                | 3.12         | 1.19          | 0.76          |
|        | Decrease from 1st to 3rd cycle (%) | 90.7         | 91.7          | 92.2          |
|        | 4th                                | 1.96         | 0.79          | 0.52          |
|        | Decrease from 1st to 4th cycle (%) | 94.2         | 94.5          | 94.7          |
| DLN2   | 1st                                | 24.73        | 11.2          | 8.9           |
|        | 2nd                                | 3.56         | 1.56          | 1.28          |
|        | Decrease from 1st to 2nd cycle (%) | 85.6         | 86.1          | 85.6          |
|        | 3rd                                | disappeared  | 0.94          | disappeared   |
|        | Decrease from 1st to 3rd cycle (%) | 100          | 91.6          | 100           |
|        | 4th                                | disappeared  | 0.5           | disappeared   |
|        | Decrease from 1st to 4th cycle (%) | 100          | 100           | 95.5          |
| B1     | 1st                                | 9.5          | 4.21          | 2.61          |
|        | 2nd                                | 1.83         | 0.92          | 0.64          |
|        | Decrease from 1st to 2nd cycle (%) | 80.74        | 78.15         | 75.48         |
|        | 3rd                                | 1.02         | 0.52          | 0.35          |
|        | Decrease from 1st to 3rd cycle (%) | 89.26        | 87.65         | 86.6          |
|        | 4th                                | 0.66         | 0.32          | 0.22          |
|        | Decrease from 1st to 4th cycle (%) | 93.05        | 92.4          | 91.57         |
| B2     | 1st                                | 5.72         | 2.33          | 1.56          |
|        | 2nd                                | 1.23         | 0.42          | 0.29          |
|        | Decrease from 1st to 2nd cycle (%) | 78.5         | 81.9          | 81.4          |
|        | 3rd                                | disappeared  | disappeared   | disappeared   |
|        | Decrease from 1st to 3rd cycle (%) | 100          | 100           | 100           |
| B3     | 1st                                | 2.9          | 0.96          | 0.66          |
|        | 2nd                                | 1.32         | 0.27          | 0.15          |
|        | Decrease from 1st to 2nd cycle (%) | 54.5         | 71.9          | 77.3          |
|        | 3rd                                | disappeared  | disappeared   | disappeared   |
|        | Decrease from 1st to 3rd cycle (%) | 100          | 100           | 100           |

## References

1. Bingham, C.M.; Castro, A.; Realini, T.; Nguyen, J.; Hogg, J.P.; Sivak-Callcott, J.A. Calculated CT volumes of lacrimal glands in normal Caucasian orbits. *Ophthalmic Plast. Reconstr. Surg.* **2013**, *29*, 157–159, doi:10.1097/IOP.0b013e3182859751.
